# Supplementary material for: 6-Gingerol ameliorates ulcerative colitis by inhibiting ferroptosis based on the integrative analysis of plasma metabolomics and network pharmacology
Source: Royal Society of Chemistry journal article supplement (doi:10.1039/d4fo00952e), 2024-01-01
Supplement: d4fo00952e1.pdf [file d4fo00952e1.pdf]

## Supplementary material

Journal name: *Food & Function*

### **6-Gingerol ameliorates ulcerative colitis by inhibiting ferroptosis based on the integrative analysis of plasma metabolomics and network pharmacology**

Wenwen Li, Yun Zhang, Quyi Wang, Yu Wang, Yuwen Fan, Erxin Shang, Shu  
Jiang\*, Jinao Duan\*

Jiangsu Collaborative Innovation Center of Chinese Medicinal Resources  
Industrialization, Nanjing University of Chinese Medicine, 138 Xianlin Road,  
Nanjing 210023, PR China

\*Corresponding author.

Prof. Shu Jiang

Jiangsu Collaborative Innovation Center of Chinese Medicinal Resources  
Industrialization, Nanjing University of Chinese Medicine, 138 Xianlin Road, Nanjing  
210023, PR China

Tel. / fax: +86 25 85811516

\*Correspondence to these authors.

Prof. Jinao Duan

Jiangsu Collaborative Innovation Center of Chinese Medicinal Resources  
Industrialization, Nanjing University of Chinese Medicine, 138 Xianlin Road, Nanjing  
210023, PR China

Tel / fax: +86 25 85811116

*E-mail address:* [jiangshu2020@126.com](mailto:jiangshu2020@126.com) (S. Jiang); [dja@njucm.edu.cn](mailto:dja@njucm.edu.cn) (J.A. Duan)

## 1. Supplementary tables

**Table S1 Assessment of DAI**

| <b>Score</b> | <b>Weight loss (%)</b> | <b>Stool</b>       | <b>Bleeding</b> |
|--------------|------------------------|--------------------|-----------------|
| 0            | <1                     | Normal             | Normal          |
| 1            | 1 ≤ ~ <5               | Softer stool       | Weak hemocult   |
| 2            | 5 ≤ ~ <10              | Loose stool        | hemocult        |
| 3            | 10 ≤ ~ <15             | Moderate diarrhoea | Visual bleeding |
| 4            | ≥15                    | Diarrhoea          | Gross bleeding  |

**Table S2 Assessment of histopathological scores**

| <b>Score</b> | <b>Extent of inflammation</b>  | <b>Infiltration neutrophils +lymphohistiocytes</b> | <b>Extent of crypt damage</b> | <b>Crypt abscesses</b> | <b>Submucosal oedema</b> | <b>Loss of goblet cells</b> | <b>Reactive epithelial hyperplasia</b> |
|--------------|--------------------------------|----------------------------------------------------|-------------------------------|------------------------|--------------------------|-----------------------------|----------------------------------------|
| 0            | None                           | None                                               | None                          | None                   | None                     | None                        | None                                   |
| 1            | Mucosa                         | Focal                                              | Basal one third               | Focal                  | Focal                    | Focal                       | Focal                                  |
| 2            | Mucosa+submucosa               | Multifocal                                         | Basal two third               | Multifocal             | Multifocal               | Multifocal                  | Multifocal                             |
| 3            | Mucosa+submucosa +muscle layer | Diffuse                                            | Entire crypt damage           | Diffuse                | Diffuse                  | Diffuse                     | Diffuse                                |
| 4            | Transmura                      | -                                                  | Crypt damage +ulceration      | -                      | -                        | -                           | -                                      |

**Table S3 Results from Pathway Analysis**

| <b>Metabolic pathways</b>               | <b>Total</b> | <b>Expected</b> | <b>Hits</b> | <b>Raw p</b> | <b>-log10 (p)</b> | <b>Holm adjust</b> | <b>FDR</b> | <b>Impact</b> |
|-----------------------------------------|--------------|-----------------|-------------|--------------|-------------------|--------------------|------------|---------------|
| Linoleic acid metabolism                | 5            | 0.04            | 3           | 3.36E-06     | 5.47              | 2.68E-04           | 2.68E-04   | 1             |
| Biosynthesis of unsaturated fatty acids | 36           | 0.27            | 4           | 1.00E-04     | 4.00              | 7.91E-03           | 4.00E-03   | 0.00          |
| Arachidonic acid metabolism             | 44           | 0.34            | 3           | 3.76E-03     | 2.43              | 2.93E-01           | 1.00E-01   | 0.36          |
| Glycerophospholipid metabolism          | 36           | 0.27            | 2           | 2.90E-02     | 1.54              | 1.00               | 5.81E-01   | 0.13          |
| $\alpha$ -Linolenic acid metabolism     | 13           | 0.10            | 1           | 9.50E-02     | 1.02              | 1.00               | 1.00       | 0.00          |
| Primary bile acid biosynthesis          | 46           | 0.35            | 1           | 3.00E-01     | 0.52              | 1.00               | 1.00       | 0.00          |

## 2. Supplementary figures

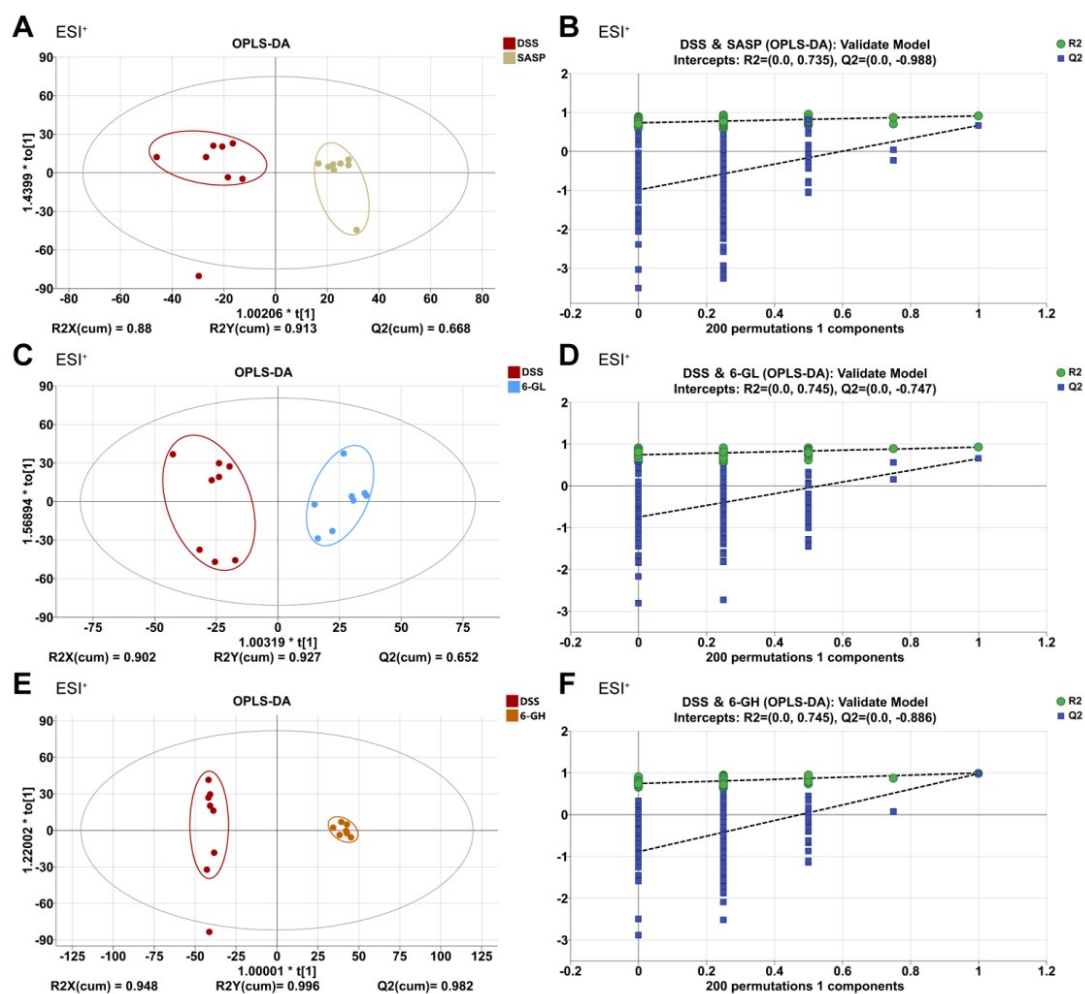

**Fig. S1** Multivariate statistical analysis of plasma metabolic profiles in positive mode. (A, C, E) PCA score plots for the DSS and SASP, 6-GL, 6-GH, respectively; (B, D, F) validation plot of the OPLS-DA model obtained from 200 permutation tests for the DSS and SASP, 6-GL, 6-GH, respectively.

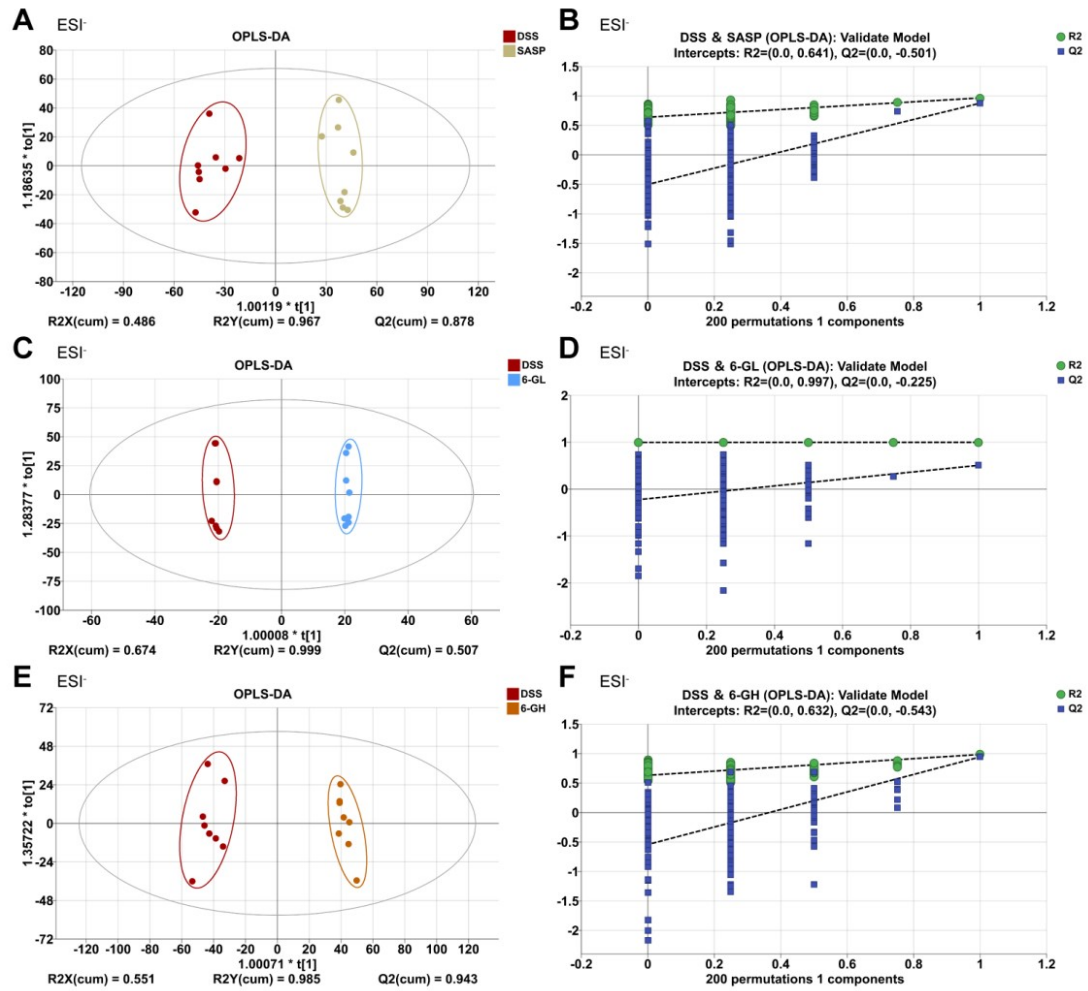

**Fig. S2** Multivariate statistical analysis of plasma metabolic profiles in negative mode. (A, C, E) PCA score plots for the DSS and SASP, 6-GL, 6-GH, respectively; (B, D, F) validation plot of the OPLS-DA model obtained from 200 permutation tests for the DSS and SASP, 6-GL, 6-GH, respectively.

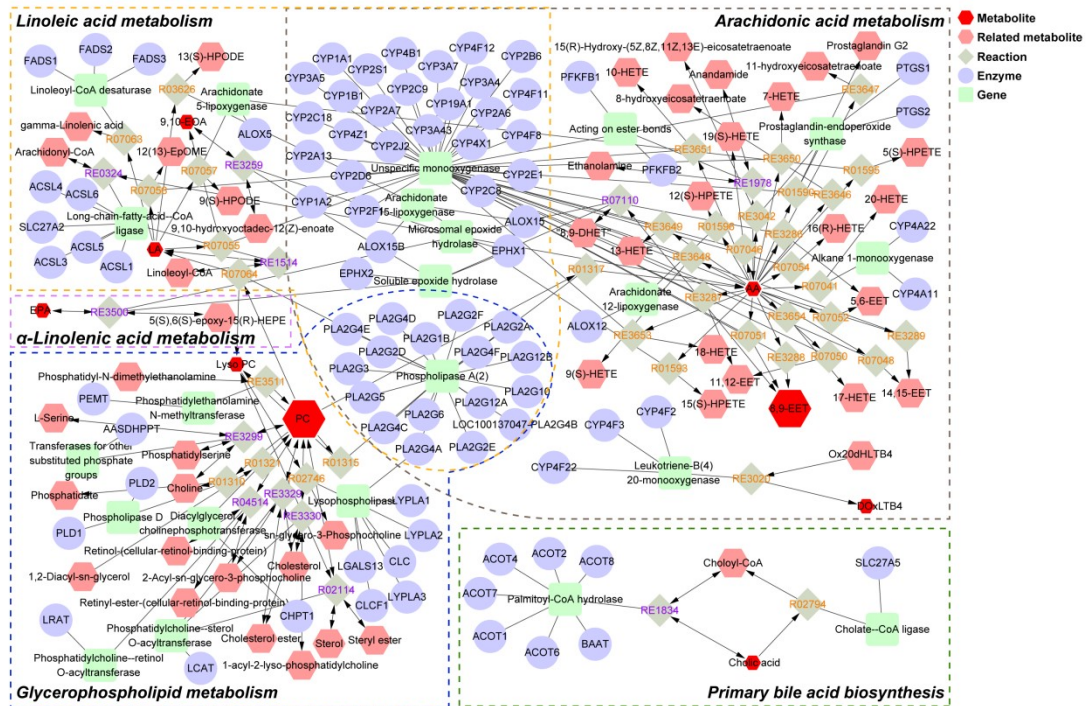

**Fig. S3** The network of metabolites-reactions-enzymes-targets.
